# Supplementary material for: Prevalence of Hepatitis B, C, and D in Germany: Results From a Scoping Review
Source: PubMed Central journal article supplement (PMC7493659; doi:10.3389/fpubh.2020.00424), 2020-08-28
Supplement: Table_1.pdf [file Table_1.pdf]

## **S1\_Text: Search strategy**

- 1. Search in Medline, EMBASE, Europe PMC, Scopus (full-text search; date of last search: 9 March 2017, search restricted to 1 January 2005 – 9 March 2017; filters: English and German language):**

#1 hepatitis b  
#2 HBV

#3 hepatitis c  
#4 HCV

#5 hepatitis d  
#6 HDV

#7 viral hepatitis

#8 European Union

#9 EU

#10 EEA

#11 europ\*

#12 german\*

#13 deutsch\*

#14 Berlin

#15 Hamburg

#16 Munich

#17 Cologne

#18 Frankfurt

#19 Stuttgart

#20 Dusseldorf

#21 Dresden

#22 Dortmund

#23 epidemiol\*

#24 seroepidem\*

#25 screen\*

#26 prevalence\*

#27 seroprevalence\*

#28 incidence\*

#29 "burden of disease"

#30 "disease burden"

#31 burden

#32 morbid\*

#33 DALY\*

#34 mortality\*

#35 letal\*

#36 risk factor\*

#37 transmission

#38 infection risk\*

#39 viraemic rate\*

#40 infection rate\*

#41 therapy rate\*

#42 healing rate\*

#43 reinfection\*

#44 vaccination rate\*

#45 vaccination coverage

#46 modelling  
#46 epidemiology  
#47 #1 OR #2 #7  
#48 #3 OR #4 OR #7  
#49 #5 OR #6 OR #7

#50 #8 OR #9 OR #10 OR #11 OR #12 OR #13 OR #14 OR #15 OR #16 OR #17 OR #18  
OR #19 OR #20 OR #21 OR #22

#51 #23 OR #24 OR #25 OR #26 OR #27 OR #28 OR #29 OR #30 OR #31 OR #32 OR #33  
OR #34 OR #35 OR #36 OR #37 OR #38 OR #39 OR #40 OR #41 OR #42 OR #43 OR #44  
OR #45 OR #46

#52 #23 OR #24 OR #25 OR #26 OR #27 OR #28 OR #29 OR #30 OR #31 OR #32 OR #33  
OR #34 OR #35 OR #36 OR #37 OR #38 OR #39 OR #40 OR #41 OR #42 OR #43 OR #46

#53 #47 AND #50 AND #51  
#54 #48 AND #50 AND #52  
#55 #49 AND #50 AND #51

**2. Search in CC Med (date of last search: 9 March 2017, search restricted to 2005 – 2017;  
filters: German language):**

#1 hepatitis b  
#2 HBV  
#3 hepatitis c  
#4 HCV  
#5 hepatitis d  
#6 HDV  
#7 virale hepatitis

#8 epidemiolog\*  
#9 seroepidemiolog\*  
#10 prävalenz  
#11 seroprävalenz  
#12 inzidenz  
#13 mortalität  
#14 morbidität  
#14 krankheitslast  
#15 folgeerkrankung\*  
#16 letal  
#17 übertragung  
#18 diagnoserate  
#19 therapierate  
#20 infektion  
#21 impf\*

#22 #1 OR #2 OR #7  
#23 #3 OR #4 OR #7  
#24 #5 OR #6 OR #7

#25 #8 OR #9 OR #10 OR #11 OR #12 OR #13 OR #14 OR #15 OR #16 OR #17 OR #18  
OR #19 OR #20 OR #21  
#26 #8 OR #9 OR #10 OR #11 OR #12 OR #13 OR #14 OR #15 OR #16 OR #17 OR #18  
OR #19 OR #20

#27 #22 AND #25  
#28 #23 AND #26  
#29 #24 AND #25

**3. Search in Base Bielefeld (date of last search: 9 March 2017, search restricted to 2005 – 2017; filters: German language):**

#1 Hepatitis B  
#2 HBV  
#3 Hepatitis C  
#4 HCV  
#5 Hepatitis D  
#6 HDV  
#7 virale Hepatitis  
#8 deutsch\*  
#9 germ\*

#10 #1 OR #2 OR #7  
#11 #3 OR #4 OR #7  
#12 #5 OR #6 OR #7

#13 #8 AND #9

#14 #10 AND #13  
#15 #11 AND #13  
#16 #12 AND #13
